# Supplementary material for: Disentangling the Tissue-Specific Variations of Volatile Flavor Profiles of the Lentinula edodes Fruiting Body
Source: MDPI journal article supplement (doi:10.3390/foods13010086), 2023-12-26
Supplement: s1 [file s1]

Table S1. Annotations of all the detected compounds from different tissues of the strain T2 and 0912 fruiting body. RT, Retention time; RI, Kovats retention index.

| Number | Compounds                       | CAS Registry<br>Number | RT    | RI   | Chemical<br>Class |
|--------|---------------------------------|------------------------|-------|------|-------------------|
| 1      | Dimethyl, disulfide             | 624-92-0               | 3.339 | 740  | Sulfur compounds  |
| 2      | 1-Octene                        | 111-66-0               | 3.915 | 792  | Alkenes           |
| 3      | 3-Cyclohepten-1-one             | 1121-64-8              | 4.461 | 820  | Ketones           |
| 4      | p-Xylene                        | 106-42-3               | 5.14  | 875  | Benzenoids        |
| 5      | Oxime-methoxy-phenyl-           | 67160-14-9             | 6.065 | 896  | Benzenoids        |
| 6      | $\alpha$ -Pinene                | 7785-70-8              | 6.19  | 928  | Terpenes          |
| 7      | Benzaldehyde                    | 100-52-7               | 6.654 | 960  | Benzenoids        |
| 8      | Diemethyl trisulfide            | 3658-80-8              | 6.818 | 975  | Sulfur compounds  |
| 9      | 1-Octen-3-one                   | 4312-99-6              | 6.939 | 979  | Ketones           |
| 10     | 1-Octen-3-ol                    | 3391-86-4              | 7.089 | 982  | Alcohols          |
| 11     | 3-Octanone                      | 106-68-3               | 7.194 | 990  | Ketones           |
| 12     | p-Cymene                        | 99-87-6                | 7.709 | 1025 | Terpenes          |
| 13     | D-Limonene                      | 5989-27-5              | 7.77  | 1032 | Terpenes          |
| 14     | Decane,3,6-diemthyl-            | 17312-53-7             | 8.17  | 1130 | Alkanes           |
| 15     | 2-Octenal                       | 2363-89-5              | 8.196 | 1060 | Aldehydes         |
| 16     | (Z)-2-Octenol                   | 26001-58-1             | 8.37  | 1071 | Alcohols          |
| 17     | Octyl choloformate              | 7452-59-7              | 8.412 | 1250 | Esters            |
| 18     | $\alpha$ ,p-Dimethylstyrene     | 1195-32-0              | 8.622 | 1120 | Benzenoids        |
| 19     | Benzene, (2-methyl-1-propenyl)- | 768-49-0               | 8.734 | 1218 | Terpenes          |

|    |                          |            |       |      |                  |
|----|--------------------------|------------|-------|------|------------------|
| 20 | 1,2,4-Trithiolane        | 289-16-7   | 8.852 | 1110 | Sulfur compounds |
| 21 | Phenylethyl alcohol      | 60-12-8    | 9.115 | 1126 | Alcohols         |
| 22 | 2,4,5-Trithiahexane      | 42474-44-2 | 9.344 | 1145 | Sulfur compounds |
| 23 | 2-Phenylpropenal         | 4432-63-7  | 9.786 | 1161 | Benzenoids       |
| 24 | Dodecane                 | 112-40-3   | 10.35 | 1221 | Alkanes          |
| 25 | Undecane,2,4-dimethyl    | 17312-80-0 | 10.51 | 1223 | Alkanes          |
| 26 | Undecane,2,6-dimethyl    | 17301-23-4 | 10.55 | 1216 | Alkanes          |
| 27 | Tetrasulfide dimethyl    | 5756-24-1  | 10.75 | 1215 | Sulfur compounds |
| 28 | 1,3-Di-tert-butylbenzene | 1014-60-4  | 11.21 | 1240 | Benzenoids       |
| 29 | Decane,1-iodo-           | 2050-77-3  | 11.28 | 1400 | Alkanes          |
| 30 | 2-Bromo dodecane         | 13187-99-0 | 11.44 | 1540 | Alkanes          |
| 31 | Heptadecane,8-methyl-    | 13287-23-5 | 11.52 | 1290 | Alkanes          |
| 32 | Tridecane                | 629-50-5   | 11.79 | 1310 | Alkanes          |
| 33 | 1,2,4,5-Tetrathiane      | 291-22-5   | 12.67 | 1332 | Sulfur compounds |
| 34 | 2,3,5,6-Tetrathiaheptane |            | 12.72 | 1344 | Sulfur compounds |
| 35 | Tetradecane              | 629-59-4   | 13.18 | 1370 | Alkanes          |
| 36 | Lenthionine              | 292-46-6   | 16.45 | 1622 | Sulfur compounds |
