# Supplementary material for: Disentangling the Tissue-Specific Variations of Volatile Flavor Profiles of the Lentinula edodes Fruiting Body
Source: MDPI journal article supplement (doi:10.3390/foods13010086), 2023-12-26
Supplement: s1 [file s1]

Table S3. The shared and specific compounds of different strains and tissues of the Venn analysis

| Groups of comparisons                            | Number of shared and specific compounds | Compounds                                                                                                                                                                                                                                                                                                                                                                                                                                                                              |
|--------------------------------------------------|-----------------------------------------|----------------------------------------------------------------------------------------------------------------------------------------------------------------------------------------------------------------------------------------------------------------------------------------------------------------------------------------------------------------------------------------------------------------------------------------------------------------------------------------|
| Comparisons of different tissues of strains T2   |                                         |                                                                                                                                                                                                                                                                                                                                                                                                                                                                                        |
| Shared by all tissue                             | 26                                      | 1,2,4,5-Tetrathiane; Oxime-Methoxy-Phenyl-; (Z)-2-Octenol; P-Xylene; Lenthionine; Dodecane; 2,3,5,6-Tetrathiaheptane; D-Limonene; Undecane,2,6-Dimethyl; 1,3-Di-Tert-Butylbenzene; 1-Octen-3-ol; Tridecane; Phenylethyl Alcohol; P-Cymene; 3-Octanone; 2,4,5-Trithiahexane;A-Pinene; Tetradecane; Benzene, 1-Methyl-4-(1-Methylethenyl)-; Benzaldehyde; 1,2,4-Trithiolane; 2-Phenylpropenal; Undecane,2,4-Dimethyl; Benzene, (2-Methyl-1-Propenyl)-; Dimethyl Disulfide; 1-Octen-3-One |
| Shared by stipe, skin and context                | 1                                       | 1-Octene                                                                                                                                                                                                                                                                                                                                                                                                                                                                               |
| Shared by stipe, gill and context                | 2                                       | Octyl Choloformate; Heptadecane,8-Methyl-                                                                                                                                                                                                                                                                                                                                                                                                                                              |
| Shared by stipe and context                      | 2                                       | Diemethyl Trisulfide; Tetrasulfide,Dimethyl                                                                                                                                                                                                                                                                                                                                                                                                                                            |
| Specific for stipe                               | 2                                       | Decane,1-Iodo-; Bromo Dodecane                                                                                                                                                                                                                                                                                                                                                                                                                                                         |
| Comparisons of different tissues of strains 0912 |                                         |                                                                                                                                                                                                                                                                                                                                                                                                                                                                                        |
| Shared by all tissue                             | 25                                      | 1,2,4,5-Tetrathiane; Decane,1-Iodo-; Oxime-Methoxy-Phenyl-; (Z)-2-Octenol; P-Xylene; Dodecane; D-Limonene; Undecane,2,6-Dimethyl; 1,3-Di-Tert-Butylbenzene; Octyl Choloformate; 1-Octen-3-ol; Tridecane; P-Cymene; 3-Octanone; Heptadecane,8-Methyl-;A-Pinene; Tetradecane; Benzene, 1-Methyl-4-(1-Methylethenyl)-; Benzaldehyde; 1,2,4-Trithiolane; 2-Phenylpropenal; Undecane,2,4-Dimethyl; Benzene, (2-Methyl-1-Propenyl)-; Dimethyl Disulfide; 1-Octen-3-One                       |
| Shared by stipe, skin and context                | 1                                       | Phenylethyl Alcohol                                                                                                                                                                                                                                                                                                                                                                                                                                                                    |
| Shared by stipe, gill and context                | 1                                       | Decan,3,6-Diemthyl-                                                                                                                                                                                                                                                                                                                                                                                                                                                                    |

|                                             |    |                                                                                                                                                                                                                                                                                                                                                                                                                                                                                                                                                                                           |
|---------------------------------------------|----|-------------------------------------------------------------------------------------------------------------------------------------------------------------------------------------------------------------------------------------------------------------------------------------------------------------------------------------------------------------------------------------------------------------------------------------------------------------------------------------------------------------------------------------------------------------------------------------------|
| Shared by skin, gill and context            | 8  | Dimethyl Trisulfide; Tetrasulfide,Dimethyl; Lenthionine; 2,3,5,6-Tetrathiaheptane; 2-Octenal; 2,4,5-Trithiahexane; 1-Octene; 2-Bromo Dodecane                                                                                                                                                                                                                                                                                                                                                                                                                                             |
| Shared by skin and context                  | 1  | 3-Cyclohepten-1-One                                                                                                                                                                                                                                                                                                                                                                                                                                                                                                                                                                       |
| Comparisons of stipes strains T2 and 0912   |    |                                                                                                                                                                                                                                                                                                                                                                                                                                                                                                                                                                                           |
| Shared by stipes of strain 0912 and T2      | 26 | Dimethyl Disulfide; P-Xylene; Oxime-Methoxy-Phenyl-; A-Pinene; Benzaldehyde; 1-Octen-3-One; 1-Octen-3-OL; 3-Octanone; P-Cymene; D-Limonene; (Z)-2-Octenol; Octyl Choloformate; Benzene, 1-Methyl-4-(1-Methylethenyl)-; Benzene, (2-Methyl-1-Propenyl)-; 1,2,4-Trithiolane; Phenylethyl Alcohol; 2-Phenylpropenal; Dodecane; Undecane,2,4-Dimethyl; Undecane,2,6-Dimethyl; 1,3-Di-Tert-Butylbenzene; Decane,1-Iodo-; Heptadecane,8-Methyl-; Tridecane; 1,2,4,5-Tetrathiane; Tetradecane                                                                                                    |
| Specific for stipes of strain 0912          | 1  | Decan,3,6-Diemthyl-                                                                                                                                                                                                                                                                                                                                                                                                                                                                                                                                                                       |
| Specific for stipes of T2                   | 7  | 1-Octene; Diemethyl Trisulfide; 2,4,5-Trithiahexane; Tetrasulfide,Dimethyl; 2-Bromo Dodecane; 2,3,5,6-Tetrathiaheptane; Lenthionine                                                                                                                                                                                                                                                                                                                                                                                                                                                       |
| Comparisons of contexts strains T2 and 0912 |    |                                                                                                                                                                                                                                                                                                                                                                                                                                                                                                                                                                                           |
| Shared by contexts of strain 0912 and T2    | 31 | Dimethyl Disulfide; 1-Octene; P-Xylene; Oxime-Methoxy-Phenyl-; A-Pinene; Benzaldehyde; Diemethyl Trisulfide; 1-Octen-3-One; 1-Octen-3-OL; 3-Octanone; P-Cymene; D-Limonene; (Z)-2-Octenol; Octyl Choloformate; Benzene, 1-Methyl-4-(1-Methylethenyl)-; Benzene, (2-Methyl-1-Propenyl)-; 1,2,4-Trithiolane; Phenylethyl Alcohol; 2,4,5-Trithiahexane; 2-Phenylpropenal; Dodecane; Undecane,2,4-Dimethyl; Undecane,2,6-Dimethyl; Tetrasulfide,Dimethyl; 1,3-Di-Tert-Butylbenzene; Heptadecane,8-Methyl-; Tridecane; 1,2,4,5-Tetrathiane; 2,3,5,6-Tetrathiaheptane; Tetradecane; Lenthionine |
| Specific for contexts of strain 0912        | 5  | 3-Cyclohepten-1-One; Decan,3,6-Diemthyl-; 2-Octenal; Decane,1-Iodo-; 2-Bromo Dodecane                                                                                                                                                                                                                                                                                                                                                                                                                                                                                                     |
| Specific for contexts of T2                 | 0  |                                                                                                                                                                                                                                                                                                                                                                                                                                                                                                                                                                                           |
| Comparisons of gills strains T2             |    |                                                                                                                                                                                                                                                                                                                                                                                                                                                                                                                                                                                           |

|                                          |    |                                                                                                                                                                                                                                                                                                                                                                                                                                                                                                               |
|------------------------------------------|----|---------------------------------------------------------------------------------------------------------------------------------------------------------------------------------------------------------------------------------------------------------------------------------------------------------------------------------------------------------------------------------------------------------------------------------------------------------------------------------------------------------------|
| and 0912                                 |    |                                                                                                                                                                                                                                                                                                                                                                                                                                                                                                               |
| Shared by gills of strain 0912 and T2    | 27 | Dimethyl Disulfide; P-Xylene; Oxime-Methoxy-Phenyl-; A-Pinene; Benzaldehyde; 1-Octen-3-One; 1-Octen-3-Ol; 3-Octanone; P-Cymene; D-Limonene; (Z)-2-Octenol; Octyl Choloformate; Benzene, 1-Methyl-4-(1-Methylethenyl)-; Benzene, (2-Methyl-1-Propenyl)-; 1,2,4-Trithiolane; 2,4,5-Trithiahexane; 2-Phenylpropenal; Dodecane; Undecane,2,4-Dimethyl; Undecane,2,6-Dimethyl; 1,3-Di-Tert-Butylbenzene; Heptadecane,8-Methyl-; Tridecane; 1,2,4,5-Tetrathiane; 2,3,5,6-Tetrathiaheptane; Tetradecane; Lenthionine |
| Specific for gills of strain 0912        | 7  | 1-Octene; Diemethyl Trisulfide; Decan,3,6-Diemthyl-; 2-Octenal; Tetrasulfide,Dimethyl; Decane,1-Iodo-; 2-Bromo Dodecane                                                                                                                                                                                                                                                                                                                                                                                       |
| Specific for gills of T2                 | 1  | Phenylethyl Alcohol                                                                                                                                                                                                                                                                                                                                                                                                                                                                                           |
| Comparisons of skins strains T2 and 0912 |    |                                                                                                                                                                                                                                                                                                                                                                                                                                                                                                               |
| Shared by skins of strain 0912 and T2    | 27 | Dimethyl Disulfide; 1-Octene; P-Xylene; Oxime-Methoxy-Phenyl-; A-Pinene; Benzaldehyde; 1-Octen-3-One; 1-Octen-3-Ol; 3-Octanone; P-Cymene; D-Limonene; (Z)-2-Octenol; Benzene, 1-Methyl-4-(1-Methylethenyl)-; Benzene, (2-Methyl-1-Propenyl)-; 1,2,4-Trithiolane; Phenylethyl Alcohol; 2,4,5-Trithiahexane; 2-Phenylpropenal; Dodecane; Undecane,2,4-Dimethyl; Undecane,2,6-Dimethyl; 1,3-Di-Tert-Butylbenzene; Tridecane; 1,2,4,5-Tetrathiane; 2,3,5,6-Tetrathiaheptane; Tetradecane; Lenthionine             |
| Specific for skins of strain 0912        | 8  | 3-Cyclohepten-1-One; Diemethyl Trisulfide; 2-Octenal; Octyl Choloformate; Tetrasulfide,Dimethyl; Decane,1-Iodo-; 2-Bromo Dodecane; Heptadecane,8-Methyl-                                                                                                                                                                                                                                                                                                                                                      |
| Specific for skins of T2                 | 0  |                                                                                                                                                                                                                                                                                                                                                                                                                                                                                                               |
