# Supplementary material for: Disentangling the Tissue-Specific Variations of Volatile Flavor Profiles of the Lentinula edodes Fruiting Body
Source: MDPI journal article supplement (doi:10.3390/foods13010086), 2023-12-26
Supplement: s1 [file s1]

**Table S2. Abundance of volatile compounds detected from different tissues of the fruiting body of different *Lentinula edodes* strains.** Data shown as mean  $\pm$  SEM, n = 3; nd = not detected. Different letters indicate significant difference at a significant level of 0.05.

| Compounds                   | Strain 0912                       |                                  |                                     |                                  | Strain T2                         |                                  |                                     |                                  |
|-----------------------------|-----------------------------------|----------------------------------|-------------------------------------|----------------------------------|-----------------------------------|----------------------------------|-------------------------------------|----------------------------------|
|                             | Stipe<br>( $\mu\text{g g}^{-1}$ ) | Skin<br>( $\mu\text{g g}^{-1}$ ) | Context<br>( $\mu\text{g g}^{-1}$ ) | Gill<br>( $\mu\text{g g}^{-1}$ ) | Stipe<br>( $\mu\text{g g}^{-1}$ ) | Skin<br>( $\mu\text{g g}^{-1}$ ) | Context<br>( $\mu\text{g g}^{-1}$ ) | Gill<br>( $\mu\text{g g}^{-1}$ ) |
| <b>Alcohols</b>             |                                   |                                  |                                     |                                  |                                   |                                  |                                     |                                  |
| 1-Octen-3-ol                | 107.44 ± 21.17 d                  | 1096.02 ± 197.34 a               | 389.91 ± 11.24 c                    | 483.50 ± 41.40 bc                | 708.63 ± 26.82 b                  | 293.61± 38.49 cd                 | 331.03 ± 20.24 cd                   | 524.67 ± 104.79 bc               |
| (Z)-2-Octenol               | 10.75 ± 0.71 c                    | 39.37 ± 8.87 b                   | 41.03 ± 1.90 b                      | 58.18 ± 6.23 a                   | 52.40 ± 2.03 ab                   | 60.53± 3.93 a                    | 42.42 ± 1.75 b                      | 20.82 ± 2.84 c                   |
| Phenylethyl alcohol         | 1.65 ± 0.35 bc                    | 3.69 ± 1.08 abc                  | 1.68 ± 0.06 bc                      | nd                               | 5.72 ± 0.71 abc                   | 6.14 ± 4.44 ab                   | 1.71 ± 0.19 bc                      | 8.07 ± 2.21 a                    |
| <b>Aldehydes</b>            |                                   |                                  |                                     |                                  |                                   |                                  |                                     |                                  |
| 2-Octenal                   | nd                                | 34.17 ± 7.87 a                   | 5.74 ± 0.24 b                       | 5.00 ± 0.44 b                    | nd                                | nd                               | nd                                  | nd                               |
| <b>Acyclic hydrocarbons</b> |                                   |                                  |                                     |                                  |                                   |                                  |                                     |                                  |
| Decan,3,6-diemthyl-         | 4.38 ± 0.11 a                     | nd                               | 3.90 ± 0.12 a                       | 4.01 ± 0.23 a                    | nd                                | nd                               | nd                                  | nd                               |
| Dodecane                    | 4.85 ± 0.24 bc                    | 6.38 ± 1.30 abc                  | 3.71 ± 0.12 bc                      | 4.48 ± 0.21 c                    | 5.59 ± 0.21 abc                   | 3.53 ± 0.18 ab                   | 9.80 ± 0.32 bc                      | 7.53 ± 1.12 a                    |
| Undecane,2,4-dimethyl       | 0.87 ± 0.17 abc                   | 1.04 ± 0.29 ab                   | 0.55 ± 0.03 c                       | 0.64 ± 0.03 bc                   | 0.82 ± 0.07 abc                   | 1.89 ± 1.37                      | 0.86 ± 0.02 abc                     | 1.17 ± 0.17 a                    |
| Undecane,2,6-dimethyl       | 2.68 ± 0.53 abc                   | 2.91 ± 0.64 ab                   | 1.75 ± 0.09 c                       | 2.12 ± 0.10 bc                   | 2.72 ± 0.23 abc                   | 6.02 ± 4.36                      | 3.65 ± 0.10 abc                     | 3.85 ± 0.56 a                    |
| Decane,1-iodo-              | 4.52 ± 0.39 ab                    | 5.65 ± 1.39 a                    | 3.03 ± 0.20 b                       | 3.83 ± 0.15 ab                   | 4.94 ± 0.42 ab                    | nd                               | nd                                  | nd                               |
| 2-Bromo dodecane            | nd                                | 1.83 ± 0.54 a                    | 0.93 ± 0.04 a                       | 1.46 ± 0.15 a                    | 1.59 ± 0.14 a                     | nd                               | nd                                  | nd                               |
| Heptadecane,8-methyl-       | 10.68 ± 0.95 bc                   | 13.22 ± 3.34 ab                  | 7.02 ± 0.42 c                       | 8.90 ± 0.40 bc                   | 11.59 ± 0.67 bc                   | nd                               | 11.89 ± 0.39 abc                    | 16.90 ± 2.83 a                   |
| Tridecane                   | 6.40 ± 0.37 cd                    | 7.69 ± 3.72                      | 4.40 ± 0.05 d                       | 5.91 ± 0.31 cd                   | 8.19 ± 0.11 bc                    | 17.28 ± 12.54                    | 17.65 ± 1.05 a                      | 9.74 ± 1.56 b                    |
| Tetradecane                 | 12.45 ± 0.85 bcd                  | 18.28 ± 5.00 b                   | 7.81 ± 0.08 d                       | 11.49 ± 0.70 bcd                 | 16.07± 0.18 bc                    | 10.18 ± 1.19 cd                  | 28.36 ± 1.88 a                      | 18.66 ± 3.15 b                   |
| 1-Octene                    | nd                                | 10.49 ± 4.91                     | 1.48 ± 0.19 b                       | 0.94 ± 0.11 b                    | 5.00 ± 1.29 a                     | 4.61 ± 3.33                      | 2.09 ± 0.35 b                       | nd                               |
| <b>Benzenoids</b>           |                                   |                                  |                                     |                                  |                                   |                                  |                                     |                                  |
| p-Xylene                    | 3.03 ± 0.39 a                     | 3.21 ± 1.49                      | 1.86 ± 0.12 c                       | 2.41 ± 0.11 abc                  | 2.41 ± 0.26 abc                   | 8.46 ± 6.15                      | 2.05 ± 0.04 bc                      | 2.61 ± 0.03 ab                   |
| Oxime-methoxy-phenyl-       | 3.25 ± 1.01 bc                    | 4.61 ± 0.82 b                    | 2.53 ± 0.10 c                       | 4.32 ± 0.41 bc                   | 4.94 ± 0.73 b                     | 10.34 ± 7.49                     | 3.38 ± 0.19 bc                      | 9.03 ± 0.43 a                    |
| Benzaldehyde                | 37.48 ± 4.79 a                    | 38.45 ± 14.21                    | 14.51 ± 1.02 c                      | 10.83 ± 1.18 c                   | 23.22 ± 2.43 b                    | 38.21 ± 13.50                    | 11.40 ± 0.57 c                      | 37.72 ± 10.71                    |
| p,α-Dimethylstyrene         | 10.11 ± 1.04 ab                   | 12.78 ± 3.01 a                   | 7.69 ± 0.36 ab                      | 10.48 ± 0.41 ab                  | 8.67 ± 0.11 ab                    | 9.25 ± 2.00 ab                   | 9.33 ± 0.38 ab                      | 10.86 ± 0.15 ab                  |
| 2-Phenylpropenal            | 1.21 ± 0.13 b                     | 12.32 ± 3.67                     | 7.39 ± 0.77 a                       | 3.03 ± 0.56 b                    | 7.27 ± 0.38 a                     | 5.05 ± 2.06 c                    | 5.62 ± 1.08 ab                      | 8.78 ± 1.92 ab                   |
| 1,3-Di-tert-butylbenzene    | 9.10 ± 0.58 a                     | 8.65 ± 1.46 ab                   | 7.04 ± 0.48 abc                     | 9.03 ± 0.12 a                    | 6.55 ± 0.22 bc                    | 5.00± 1.15 c                     | 8.62 ± 0.33 ab                      | 8.37 ± 0.16 ab                   |
| <b>Esters</b>               |                                   |                                  |                                     |                                  |                                   |                                  |                                     |                                  |
| Octyl choloformate          | 22.36 ± 0.89 c                    | 124.67 ± 26.36 a                 | 61.63 ± 0.66 b                      | 32.02 ± 2.22 bc                  | 117.36 ± 11.21 a                  | nd                               | 45.84 ± 1.39 bc                     | 31.54 ± 7.48 bc                  |
| <b>Ketones</b>              |                                   |                                  |                                     |                                  |                                   |                                  |                                     |                                  |

|                                 |                  |                   |                  |                  |                  |                   |                  |                   |
|---------------------------------|------------------|-------------------|------------------|------------------|------------------|-------------------|------------------|-------------------|
| 3-Cyclohepten-1-one             | nd               | 40.73 ± 23.02 a   | 9.11 ± 0.94 b    | nd               | nd               | nd                | nd               | nd                |
| 1-Octen-3-one                   | 348.34 ± 7.67 a  | 240.82 ± 79.82 ab | 177.11 ± 10.55 b | 196.93 ± 10.70 b | 169.94 ± 28.27 b | 208.57 ± 48.87 b  | 190.55 ± 9.30 b  | 156.254 ± 33.88 b |
| 3-Octanone                      | 278.22 ± 26.41 a | 115.35 ± 67.36 ab | 44.13 ± 13.39 bc | 24.19 ± 6.42 d   | 67.15 ± 26.91 cd | 151.98 ± 25.57 bc | 99.93 ± 0.94 cd  | 218.85 ± 54.49 ab |
| <b>Sulfur compounds</b>         |                  |                   |                  |                  |                  |                   |                  |                   |
| Dimethyl disulfide              | 3.95 ± 0.77 e    | 46.19 ± 5.55 cd   | 78.63 ± 6.55 b   | 39.09 ± 0.61 cd  | 63.32 ± 17.16 bc | 25.00 ± 10.76 de  | 159.30 ± 8.53 a  | 7.21 ± 2.10 e     |
| Dimethyl trisulfide             | nd               | 133.91 ± 61.80 ab | 112.02 ± 10.03 b | 72.66 ± 3.76 b   | 75.47 ± 12.12 b  | nd                | 212.39 ± 14.61 a | nd                |
| 1,2,4-Trithiolane               | 6.90 ± 0.34 c    | 38.59 ± 7.57 b    | 41.54 ± 0.53 b   | 44.01 ± 2.42 b   | 47.98 ± 6.19 b   | 10.76 ± 1.80 c    | 39.18 ± 3.19 b   | 91.95 ± 18.00 a   |
| 2,4,5-Trithiahexane             | nd               | 3.715 ± 0.65 cd   | 16.24 ± 1.33 a   | 6.75 ± 0.37 b    | 6.34 ± 1.39 bc   | 2.57 ± 1.24 d     | 18.58 ± 0.58 a   | 1.94 ± 0.38 b     |
| Tetrasulfide dimethyl           | nd               | 8.38 ± 1.35 c     | 22.21 ± 2.67 b   | 10.50 ± 1.34 bc  | 6.95 ± 1.05 c    | nd                | 58.26 ± 7.94 a   | nd                |
| 1,2,4,5-Tetrathiane             | 2.80 ± 0.18 c    | 142.35 ± 42.08 a  | 48.05 ± 3.49 bc  | 60.46 ± 5.34 b   | 145.12 ± 4.68 a  | 33.86 ± 3.32 bc   | 52.26 ± 3.86 bc  | 61.43 ± 8.88 b    |
| 2,3,5,6-Tetrathiaheptane        | nd               | 18.88 ± 5.35 c    | 48.38 ± 3.22 b   | 12.96 ± 1.26 cd  | 23.32 ± 3.92 c   | 6.15 ± 2.35 d     | 69.76 ± 5.75 a   | 4.21 ± 0.81 d     |
| Lenthionine                     | nd               | 67.84 ± 13.98 b   | 38.75 ± 2.01 cd  | 39.14 ± 7.49 cd  | 95.39 ± 8.65 a   | 10.94 ± 2.88 e    | 51.18 ± 5.91 bc  | 23.53 ± 2.45 de   |
| <b>Terpenes</b>                 |                  |                   |                  |                  |                  |                   |                  |                   |
| α-Pinene                        | 0.78 ± 0.15 b    | 1.75 ± 0.81       | 0.85 ± 0.02 ab   | 0.96 ± 0.05 ab   | 0.93 ± 0.02 ab   | 2.72 ± 1.98       | 1.15 ± 0.03 a    | 0.99 ± 0.03 ab    |
| p-Cymene                        | 36.84 ± 2.74 ab  | 38.43 ± 7.70 a    | 32.27 ± 2.51 abc | 36.68 ± 0.98 ab  | 27.34 ± 0.71 bc  | 23.26 ± 2.31 c    | 35.10 ± 0.94 ab  | 32.58 ± 1.41 abc  |
| D-limonene                      | 16.52 ± 1.59 a   | 14.79 ± 3.11 ab   | 12.60 ± 0.84a b  | 13.88 ± 0.53 ab  | 10.60 ± 0.41 b   | 26.87 ± 14.07     | 14.07 ± 0.38 ab  | 12.67 ± 0.49 ab   |
| Benzene, (2-methyl-1-propenyl)- | 6.71 ± 1.28 a    | 8.34 ± 3.92       | 2.95 ± 0.23 b    | 3.65 ± 0.18 b    | 3.71 ± 0.21 b    | 4.09 ± 1.42 b     | 3.83 ± 0.35 b    | 3.88 ± 0.11 b     |

The grey value was excluded for significance test as they have two large within group variation. Abundance of compounds were calculated based on fresh weight of samples.
